# Supplementary figures and images for: Chronic Inflammatory Enteropathy and Low-Grade Intestinal T-Cell Lymphoma Are Associated with Altered Microbial Tryptophan Catabolism in Cats
Source: MDPI journal article supplement (doi:10.3390/ani14010067), 2023-12-23

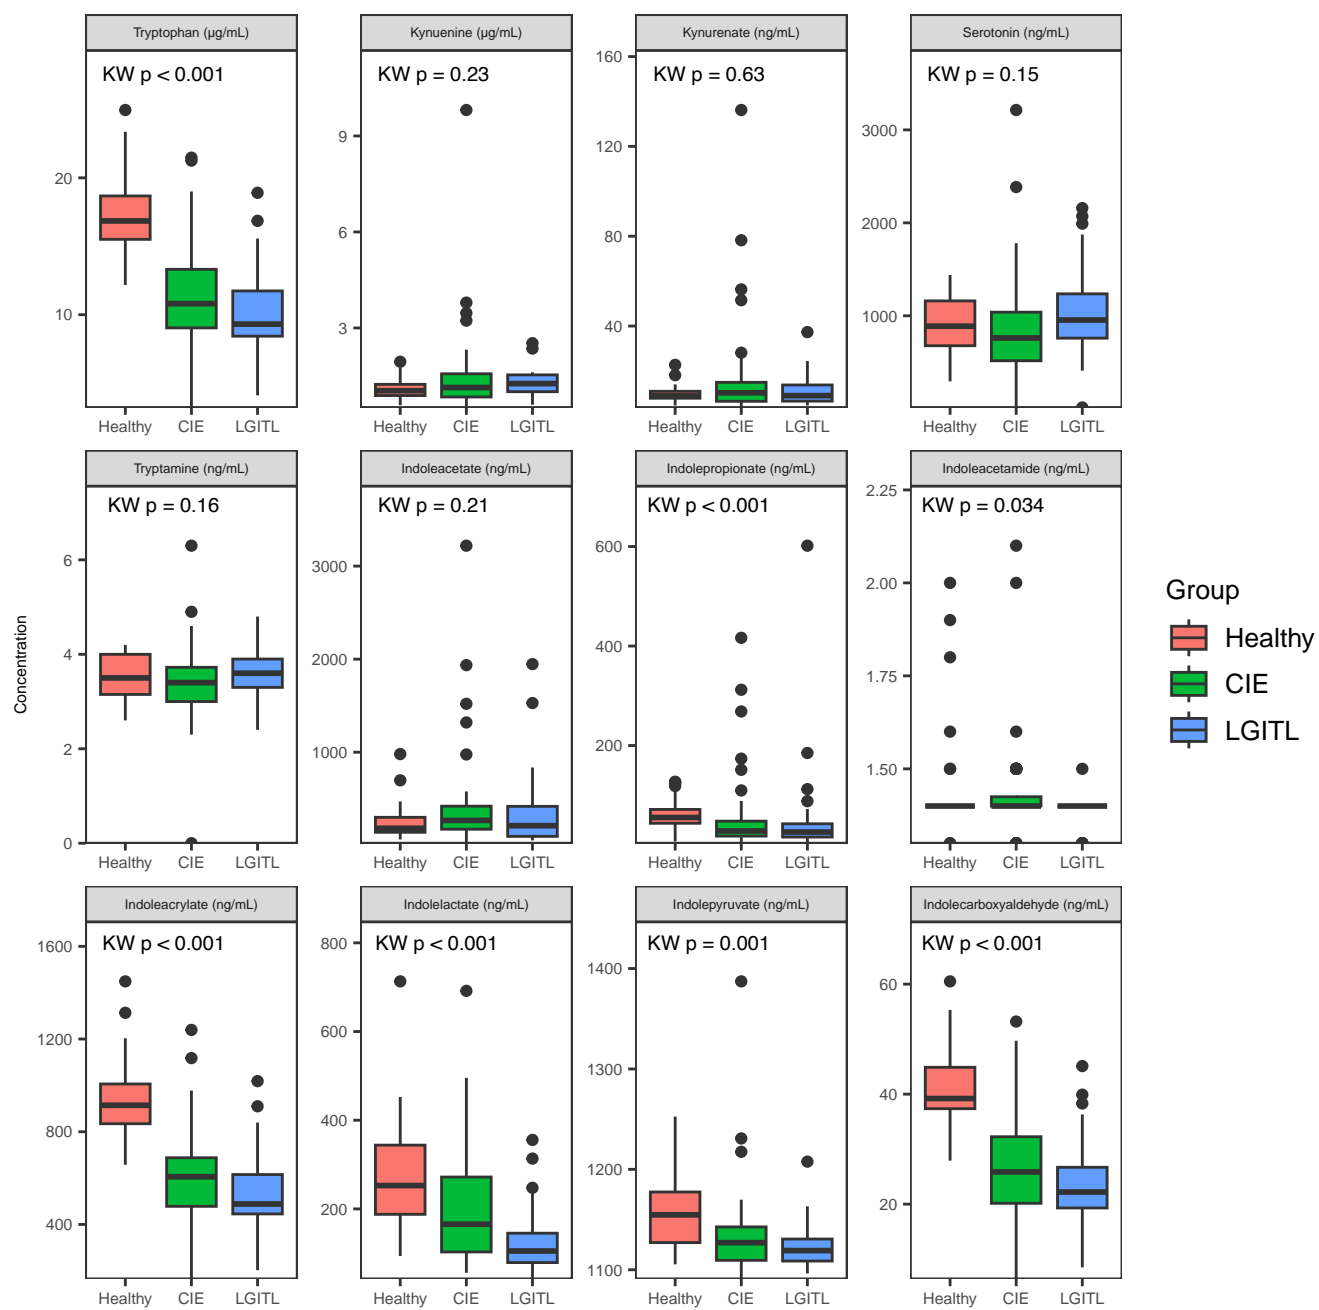

Supplement: s1 [file s1]
